# Supplementary material for: Group 3 Innate Lymphoid Cells are regulated by WASP in a microbiota-dependent manner
Source: bioRxiv or medRxiv preprint supplement (doi:10.1101/2022.07.19.500438), 2022-07-20
Supplement: Supplementary file [file media-1.pdf]

Figure S1

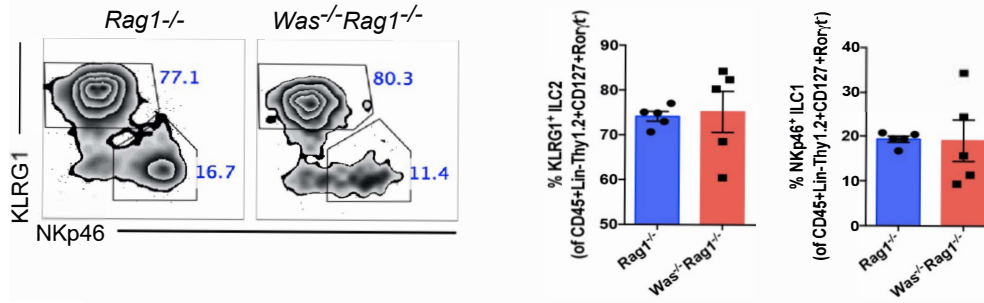

**Supplementary Figure S1: Normal ILC1 and ILC2 development in the colon of *Was*<sup>-/-</sup> mice.** Flow cytometric analysis of LP ILC1s and ILC2s (left) in mice at 12 weeks of age, followed by quantification (right) of ILC1s and ILC2s. ILC1s were gated as live CD45<sup>+</sup>Lin<sup>-</sup>Thy1.2<sup>+</sup>CD127<sup>+</sup>RORγt<sup>+</sup>NKp46<sup>+</sup> whereas ILC2s were gated as live CD45<sup>+</sup>Lin<sup>-</sup>Thy1.2<sup>+</sup>CD127<sup>+</sup>RORγt<sup>+</sup>KLRG1<sup>+</sup>. Each dot in the right graphs represents an individual animal.
